# Supplementary material
Source: Springer Nature journal article supplement (https://www.springermedizin.de/resource/supplementary/12913_2009_1305_MOESM1_ESM.pdf/9527816)

Unit A

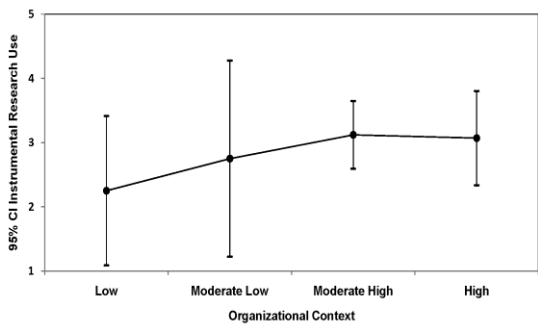

Unit A

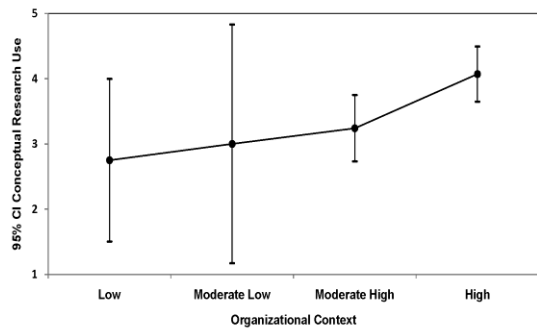

Unit B

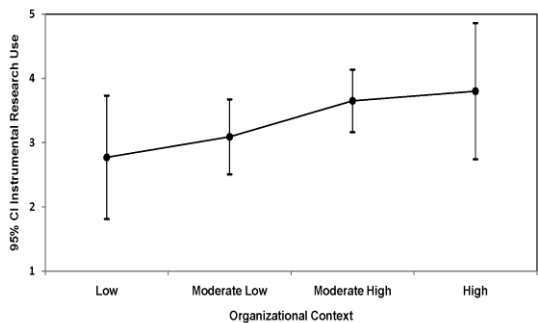

Unit B

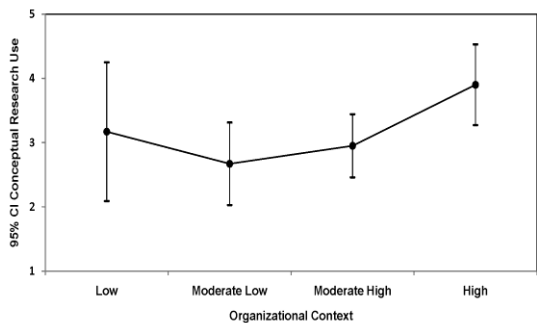

Unit C

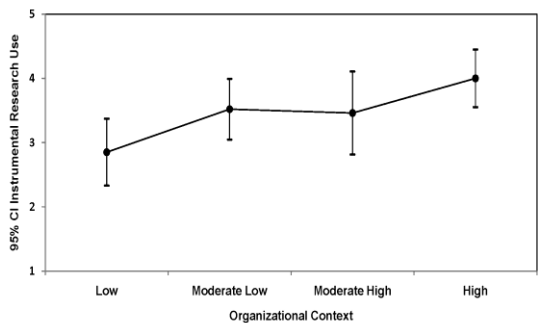

Unit C

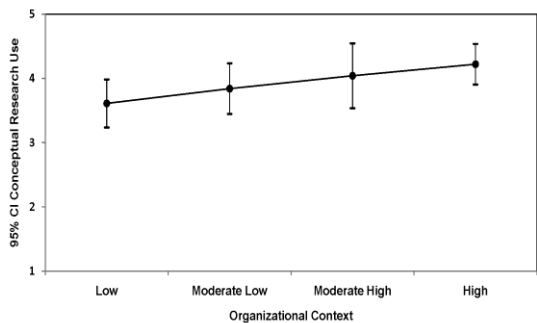

Supplement: MOESM1 [file 9527816]
